# Supplementary material for: Gene design, optimization of protein expression and preliminary evaluation of a new chimeric protein for the serological diagnosis of both human and canine visceral leishmaniasis
Source: PLOS journal article supplement (doi:10.1371/journal.pntd.0008488), 2020-07-27
Supplement: S14 (10.1371/journal.pntd.0008488.s014) [file journal.pntd.0008488.s014]

**Supporting Fig. S13. Alignment comparing the amino acid sequences of the D2 and Q1SX chimeras, highlighting the Lci3 repeats missing from Q1SX.**  
The repeats found in D2, but missing from Q1SX are boxed

|      |            |            |            |            |             |            |            |            |     |
|------|------------|------------|------------|------------|-------------|------------|------------|------------|-----|
| Q1SX | MAKKLLFAIP | LVVPFYSETM | ASMTGCGQMC | R-----     | -----MIEAEE | QARREAEQA  | RRVAEEQARR | EAEQARREV  | 67  |
| D2   | MR         | GSHHHHEG   | ASMTGCGQMC | ROIYDDDDKD | RWGSEIEAEE  | QARREAEQA  | RRVAEEQARR | EAEQARREV  | 72  |
| Q1SX | ELEEKLRGTE | ARAAELAARL | KATAAMKASM | VQERESARDA | LEEKLRGSEV  | RAAELAARLK | AAVAAKSSAE | QDRENTRTL  | 147 |
| D2   | ELEEKLRGTE | ARAAELAARL | KATAAMKASM | VQERESARDA | LEEKLRGSEV  | RAAELAARLK | AAVAAKSSAE | QDRENTRTL  | 152 |
| Q1SX | EQRLESEER  | AAELASQLEA | AAAAKSSAEQ | DRENTRAALE | EKLKGSEERA  | AELGTRVKAS | SAAKALAEQE | RDRIRAALEE | 227 |
| D2   | EQRLESEER  | AAELASQLEA | AAAAKSSAEQ | DRENTRAALE | EKLKGSEERA  | AELGTRVKAS | SAAKALAEQE | RDRIRAALEE | 232 |
| Q1SX | KLRDSEARAA | ELTTKLEATV | AAKSSAEQER | ENIKVAVE-- | -----       | -----      | -----      | -----      | 265 |
| D2   | KLRDSEARAA | ELTTKLEATV | AAKSSAEQER | ENIKVAVEEL | QKAQEDGERQ  | KADNRQLASD | NERLATELER | AQEEAERLAG | 312 |
| Q1SX | -----      | -----      | -----      | -----      | -----       | -----      | -----      | -----      | 291 |
| D2   | DLEKAESEAE | RLAGDLEKAO | EEAETLAGEL | QKAQEDGERQ | KADNRQLASD  | NERLATELER | AQEEAERLAG | DLEKAESEAE | 392 |
| Q1SX | RLAGDLEKAO | EEAETLAGVN | ELADKDPELA | AFREKRRAAH | GARADEPELA  | AADGISTRNA | RAGSRGRPAA | QINPAEAVD  | 371 |
| D2   | RLAGDLEKAO | EEAETLAGVD | ELADKDPELA | AFREKRRAAH | GARADEPELA  | AADGISTRNA | RAGSRGRPAA | QINPAEAVD  | 472 |
| Q1SX | PVTIAAEPLY | AVTLDEYKAK | QTALENAVEV | ACAAEETVKE | KLRENSDLMV  | ELEKVRDQAY | EMDRRRQEDC | AAMEGELLVV | 451 |
| D2   | PVTIAAEPLY | AVTLDEYKAK | QTALENAVEV | ACAAEETVKE | KLRENSDLMV  | ELEKVRDQAY | EMDRRRQEDC | AAMEGELLVV | 552 |
| Q1SX | LMELKKIKGI | NDALLAVLRD | KECEVKELRY | HNELWVDPTG | DKKQVVTRHT  | KIFDCNWERI | VRERPEGLFA | AFVIDSSNAC | 531 |
| D2   | LMELKKIKGI | NDALLAVLRD | KECEVKELRY | HNELWVDPTG | DKKQVVTRHT  | KIFDCNWERI | VRERPEGLFA | AFVIDSSNAC | 632 |
| Q1SX | HVPGDNIKQV | SFDHDSHHHH | H          | 552        |             |            |            |            |     |
| D2   | HVPGDNIKQV | SFDHDEFEA  |            | 651        |             |            |            |            |     |
